# Supplementary material for: Antioxidant, Antidiabetic, and Anti-Obesity Properties of Apple Pulp Extracts (Malus domestica Bork): A Comparative Study of 15 Local and Commercial Cultivars from Spain
Source: MDPI journal article supplement (doi:10.3390/biology12070891), 2023-06-21
Supplement: s1 [file s1]

**Table S1.** Folin-Ciocalteu data of the 15 apple pulp extracts expressed as the mean of milligrams of gallic acid per gram of dry weight extract of each repetition. Note: Outlier points are marked. \*  $p < 0.05$ .

| Sample                 | Values ( $\mu\text{g}$ gallic acid/gram of extract) |
|------------------------|-----------------------------------------------------|
| Arraiza                | 8.98                                                |
|                        | 10.42                                               |
|                        | 7.53                                                |
|                        | 8.23                                                |
| De Mine                | 7.02                                                |
|                        | 6.69                                                |
|                        | 7.59                                                |
|                        | 6.05                                                |
| Gordoncha              | 6.98                                                |
|                        | 5.54                                                |
|                        | 5.64                                                |
|                        | 6.15                                                |
| Ziordia                | 17.55                                               |
|                        | 14.99                                               |
|                        | 16.67                                               |
|                        | 14.65                                               |
| M. Tomate              | 10.43                                               |
|                        | 8.10                                                |
|                        | 9.20                                                |
|                        | 8.62                                                |
| Pomera del pais        | 3.43                                                |
|                        | 4.53                                                |
|                        | 5.42                                                |
|                        | 4.01                                                |
| MA-190                 | 7.57                                                |
|                        | 7.26                                                |
|                        | 6.61                                                |
|                        | 6.94                                                |
| Manzana helada         | 10.54                                               |
|                        | 8.73                                                |
|                        | 8.91                                                |
|                        | 10.26                                               |
| Pomera de Pomes agrias | 18.02                                               |
|                        | 17.45                                               |
|                        | 18.49                                               |
|                        | 17.47                                               |
| Doncella de San Martin | 12.09                                               |
|                        | 13.03                                               |
|                        | 15.83                                               |
|                        | 13.02                                               |
| Esperiega de Ademuz    | 6.37                                                |
|                        | 5.48                                                |
|                        | 4.50                                                |
|                        | 5.67                                                |
| Amarilla de Octubre    | 32.82                                               |
|                        | 21.98                                               |

|             |        |
|-------------|--------|
|             | 26.90  |
|             | 42.50* |
|             | -      |
| Royal Gala  | 1.92*  |
|             | 5.34   |
|             | 5.33   |
|             | 6.01   |
| V. Doncella | 5.51   |
|             | 6.75   |
|             | 5.97   |
|             | 4.59   |
|             | 4.37   |
| Pinova      | 5.07   |
|             | 4.23   |
